# Supplementary material for: Insight into the effect of non-stoichiometric sulfur on a NiMoS hydrodesulfurization catalyst
Source: Royal Society of Chemistry journal article supplement (doi:10.1039/c5cy01142f), 2015-08-07
Supplement: c5cy01142f1.pdf [file c5cy01142f1.pdf]

**Electronic Supplementary Information (ESI) for:**

**Insight into the effect of non-stoichiometric sulfur over  
NiMoS hydrodesulfurization catalyst**

Weikun Lai, Yingrui Xu, Yuhong Ren, Lefu Yang, Jinbao Zheng, Xiaodong Yi\* and  
Weiping Fang\*

*National Engineering Laboratory for Green Chemical Productions of Alcohols-  
ethers-esters, State Key Laboratory for Physical Chemistry of the Solid Surfaces,  
College of Chemistry and Chemical Engineering, Xiamen University, Xiamen 361005,  
China. Fax/Tel: +86-592-2186291; E-mail: [wpang@xmu.edu.cn](mailto:wpang@xmu.edu.cn); [xdyi@xmu.edu.cn](mailto:xdyi@xmu.edu.cn).*

## Results

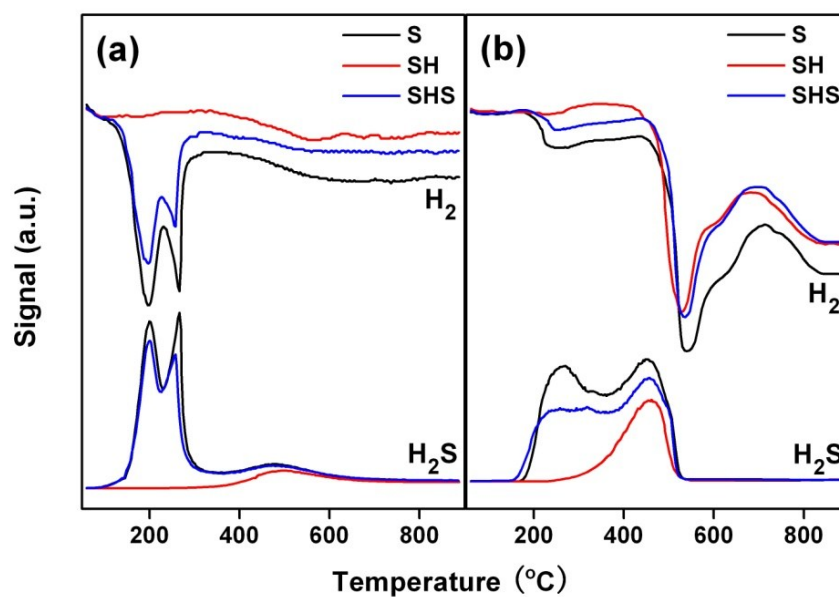

**Fig. S1** Temperature-programmed reduction curves (mass spectrometry detection) of sulfide NiMo/Al<sub>2</sub>O<sub>3</sub> (a) and NiMo (b) samples. -S: sulfide, -SH: reduced after presulfidation, -SHS: sulfurized again after presulfidation and reduction.

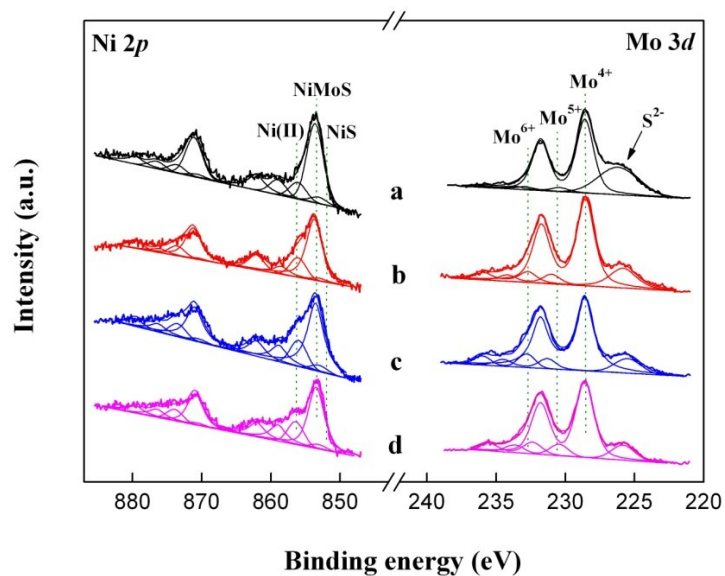

**Fig. S2** Ni 2p and Mo 3d XPS spectra of the NiMo/Al<sub>2</sub>O<sub>3</sub> catalysts and their decomposition.

(a: NiMoAl-S, b: NiMoAl-S-spent, c: NiMoAl-SH, d: NiMoAl-SH-spent)

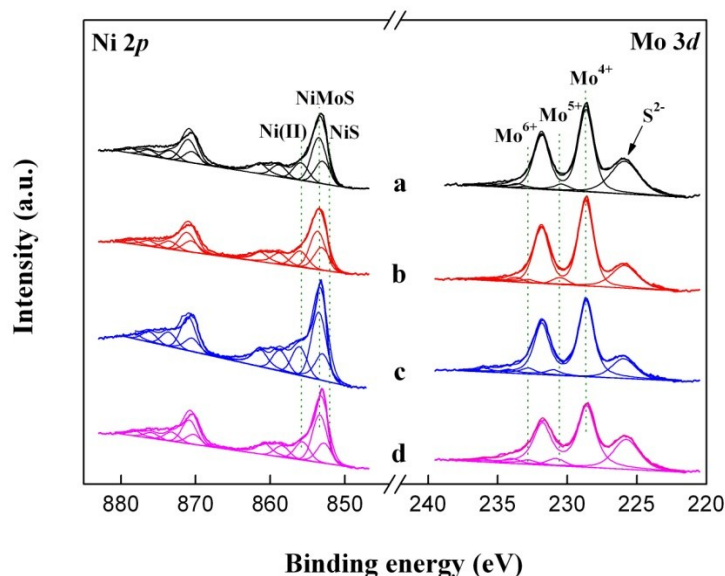

**Fig. S3** Ni  $2p$  and Mo  $3d$  XPS spectra of the NiMo catalysts and their decomposition.

(a: NiMo-S, b: NiMo-S-spent, c: NiMo-SH, d: NiMo-SH-spent)

Ni  $2p$  and Mo  $3d$  XPS spectra of the samples are shown in Fig. S2 and Fig. S3, and the decomposition results can be seen in Table S1 and Table S2. It can be observed that molybdenum can exist as  $\text{MoS}_2$  ( $\text{Mo}^{4+}$ ), which is located at  $228.6 \pm 0.1$  eV.  $\text{Mo}^{6+}$  species located at  $232.8 \pm 0.2$  eV is obviously a Mo oxide species that has not been sulfurized. The last phase is an intermediate state Mo oxysulfide ( $\text{MoO}_x\text{S}_y$ ,  $\text{Mo}^{5+}$ ), which appears at  $230.6 \pm 0.2$  eV. Otherwise, a broad peak at 226.0 eV is assigned to S  $2s$  and subtracted from the total spectrum of Mo  $3d$ . As shown in Fig. S2 and Fig. S3, Ni  $2p_{3/2}$  binding energy is  $853.6 \pm 0.1$  eV, which corresponds to Ni in the Ni-Mo-S structure. The peak at  $856.1 \pm 0.2$  eV corresponds to Ni(II) oxide species ( $\text{NiAl}_2\text{O}_4$ ,  $\text{NiO}_x$ ), Ni also may exist as  $\text{NiS}_x$  ( $\text{Ni}_3\text{S}_2$ ,  $\text{Ni}_9\text{S}_8$ ,  $\text{NiS}$ ), which is located at  $853.0 \pm 0.1$  eV. The remaining two broad peaks to the envelopes are satellite lines of the corresponding Ni species.

**Table S1** XPS parameters of the different contributions of Mo 3*d* obtained for the sulfideNiMo/Al<sub>2</sub>O<sub>3</sub> and unsupported NiMo catalysts

| Sample          | Mo <sup>IV</sup> |        | Mo <sup>V</sup> |        | Mo <sup>VI</sup> |        |
|-----------------|------------------|--------|-----------------|--------|------------------|--------|
|                 | BE (eV)          | %atom. | BE (eV)         | %atom. | BE (eV)          | %atom. |
| NiMoAl-S        | 228.6            | 90.1   | 230.4           | 5.3    | 232.9            | 4.6    |
| NiMoAl-S-spent  | 228.6            | 81.1   | 231.0           | 8.4    | 232.7            | 10.5   |
| NiMoAl-SH       | 228.6            | 80.3   | 231.0           | 9.3    | 232.8            | 10.4   |
| NiMoAl-SH-spent | 228.6            | 78.5   | 230.5           | 10.2   | 232.6            | 11.3   |
| NiMo-S          | 228.7            | 89.5   | 230.4           | 7.8    | 232.9            | 2.7    |
| NiMo-S-spent    | 228.7            | 89.4   | 230.5           | 6.3    | 232.8            | 4.3    |
| NiMo-SH         | 228.6            | 85.4   | 231.0           | 7.0    | 232.8            | 7.6    |
| NiMo-SH-spent   | 228.6            | 84.9   | 230.8           | 8.6    | 232.8            | 6.5    |

**Table S2** XPS parameters of the different contributions of Ni 2*p* obtained for the sulfideNiMo/Al<sub>2</sub>O<sub>3</sub> and unsupported NiMo catalysts

| Sample          | NiMoS   |        | NiS <sub>x</sub> |        | Ni (II) |        |
|-----------------|---------|--------|------------------|--------|---------|--------|
|                 | BE (eV) | %atom. | BE (eV)          | %atom. | BE (eV) | %atom. |
| NiMoAl-S        | 853.6   | 77.1   | 853.1            | 7.0    | 856.1   | 15.9   |
| NiMoAl-S-spent  | 853.7   | 76.8   | 853.0            | 4.2    | 856.1   | 19.1   |
| NiMoAl-SH       | 853.6   | 74.7   | 853.0            | 4.9    | 856.0   | 20.4   |
| NiMoAl-SH-spent | 853.5   | 73.3   | 853.1            | 4.4    | 856.3   | 22.3   |
| NiMo-S          | 853.5   | 53.2   | 853.0            | 26.3   | 855.9   | 20.5   |
| NiMo-S-spent    | 853.6   | 51.9   | 853.1            | 26.6   | 856.0   | 21.5   |
| NiMo-SH         | 853.4   | 52.3   | 852.9            | 25.6   | 856.0   | 22.2   |
| NiMo-SH-spent   | 853.5   | 53.7   | 852.9            | 24.6   | 855.8   | 21.7   |

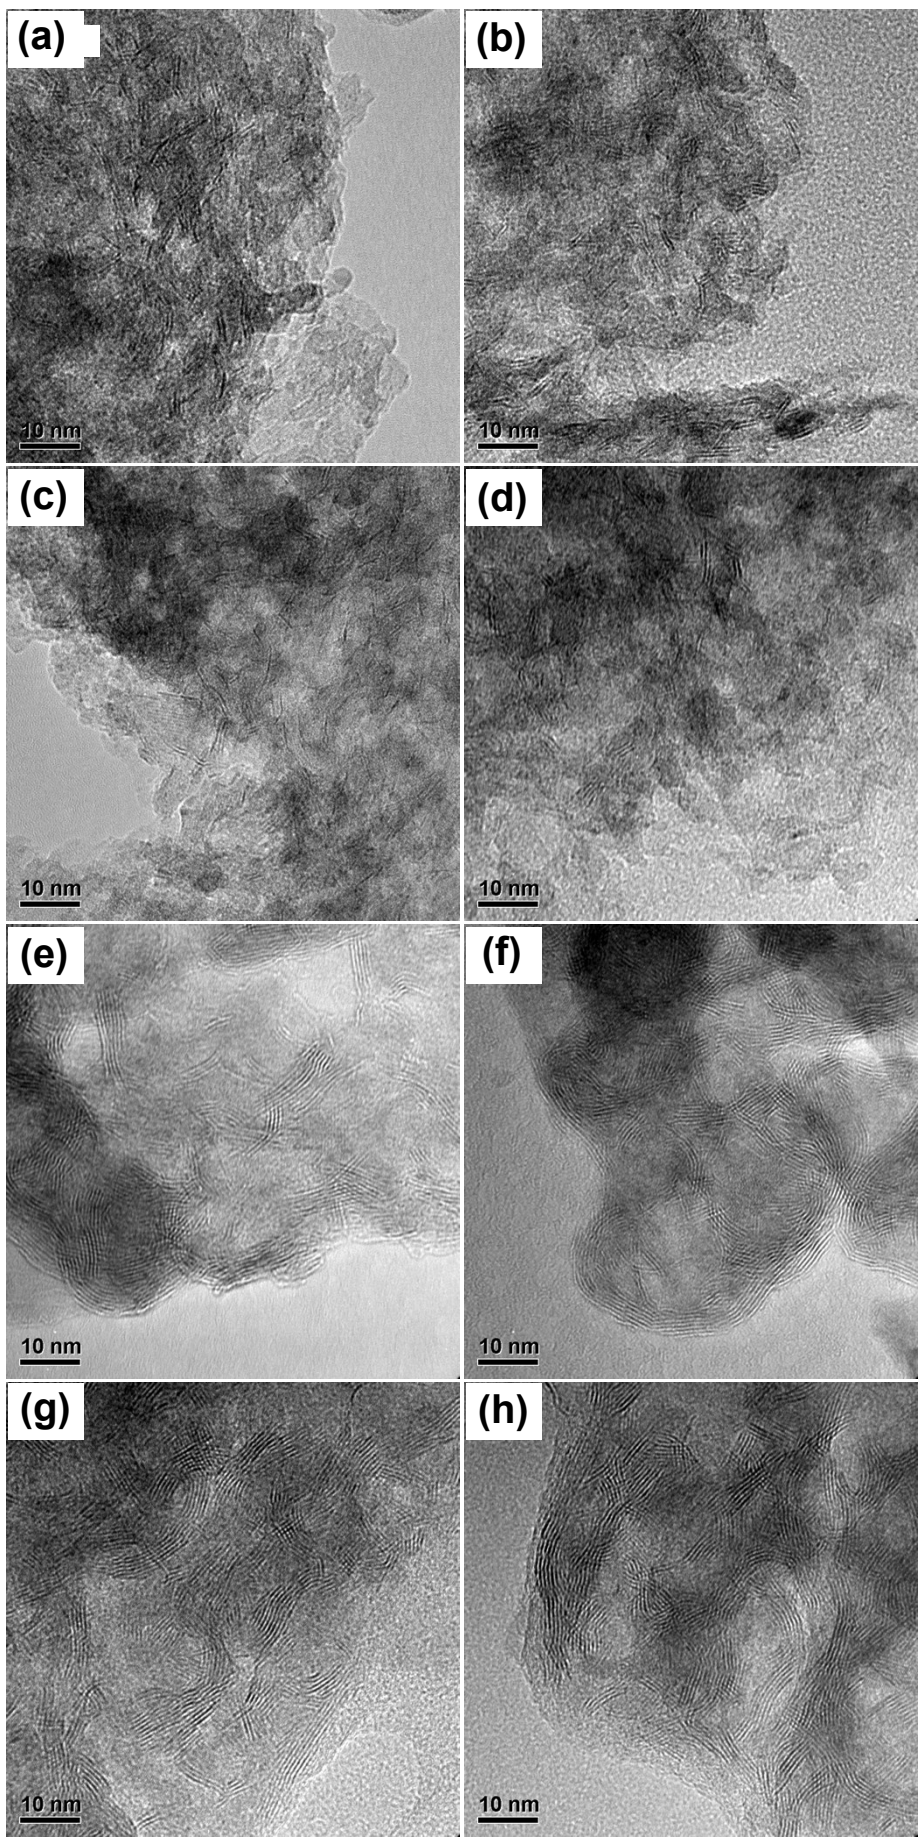

**Fig. S4** HRTEM images of: (a) NiMoAl-S, (b) NiMoAl-S-spent, (c) NiMoAl-SH, (d) NiMoAl-SH-spent, (e) NiMo-S, (f) NiMo-S-spent, (g) NiMo-SH, (h) NiMo-SH-spent.

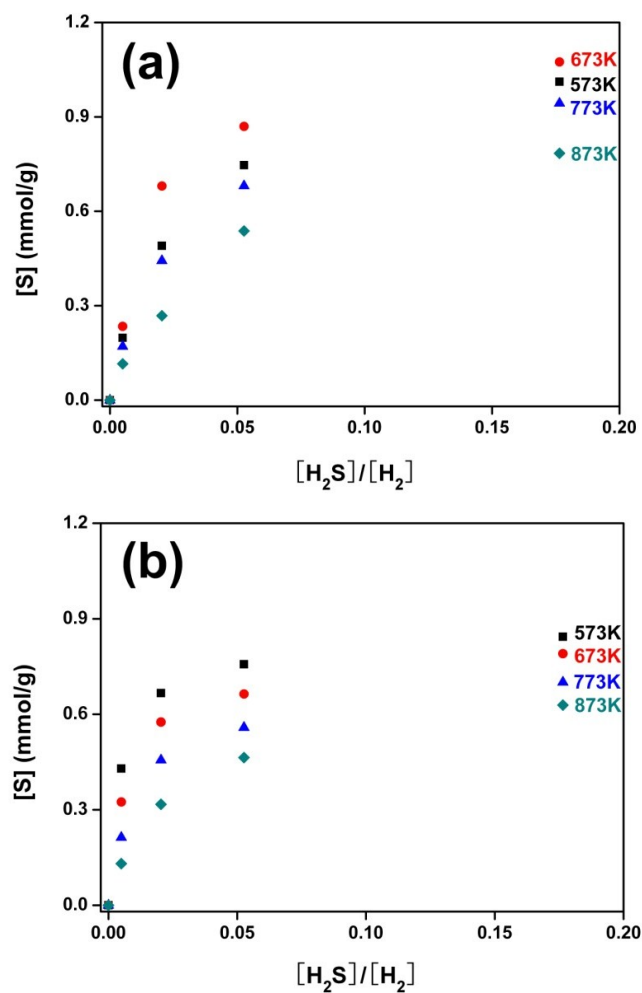

**Fig. S5** Equilibrium labile sulfur content of NiMo/Al<sub>2</sub>O<sub>3</sub> (a) and NiMo (b) samples measured at different H<sub>2</sub>S partial pressure and different temperature.
